# Supplementary material for: Extensive Degradation and Low Bioavailability of Orally Consumed Corn miRNAs in Mice
Source: PubMed Central journal article supplement (PMC5852791; doi:10.3390/nu10020215), 2018-02-15
Supplement: nutrients-10-00215-s001.pdf [file nutrients-10-00215-s001.pdf]

SUPPLEMENTAL INFORMATION:

Supplemental Table 1. Diet composition

| <b>Diet group</b>               | <b>AIN93M base diet</b> | <b>AIN93M+3% fresh corn powder</b> | <b>AIN93M+3% autoclaved corn powder</b> |
|---------------------------------|-------------------------|------------------------------------|-----------------------------------------|
| <b>Ingredient</b>               | <b>gm</b>               | <b>gm</b>                          | <b>gm</b>                               |
| Casein                          | 140                     | 135.9                              | 135.9                                   |
| L-Cystine                       | 1.8                     | 1.8                                | 1.8                                     |
| Corn Starch                     | 495.692                 | 473.8                              | 473.8                                   |
| Maltodextrin 10                 | 125                     | 125                                | 125                                     |
| Sucrose                         | 100                     | 97                                 | 97                                      |
| Cellulose, BW200                | 50                      | 47.5                               | 47.5                                    |
| Soybean Oil                     | 40                      | 39.1                               | 39.1                                    |
| t-Butylhydroquinone             | 0.008                   | 0.008                              | 0.008                                   |
| Mineral Mix S10022M             | 35                      | 35                                 | 35                                      |
| Vitamin Mix V10037              | 10                      | 10                                 | 10                                      |
| Choline Bitartrate              | 2.5                     | 2.5                                | 2.5                                     |
| <b>Fresh corn powder</b>        | <b>0</b>                | <b>30</b>                          | <b>0</b>                                |
| <b>Autoclaved corn powder</b>   | <b>0</b>                | <b>0</b>                           | <b>30</b>                               |
| <b>Total</b>                    | <b>1000</b>             | <b>997.608</b>                     | <b>997.608</b>                          |
| <b>Fresh corn powder %</b>      | <b>0.00</b>             | <b>3.01</b>                        | <b>0.00</b>                             |
| <b>Autoclaved corn powder %</b> | <b>0.00</b>             | <b>0.00</b>                        | <b>3.01</b>                             |
| <b>gm</b>                       |                         |                                    |                                         |
| Protein                         | 125.0                   | 125.0                              | 125.0                                   |
| Fat                             | 40.0                    | 40.0                               | 40.0                                    |
| Total Carbohydrate              | 730.7                   | 730.7                              | 730.7                                   |
| Sugar                           | 100.0                   | 100.0                              | 100.0                                   |
| Fiber                           | 50.0                    | 50.0                               | 50.0                                    |
| <b>kcal</b>                     |                         |                                    |                                         |
| Protein                         | 500                     | 500                                | 500                                     |
| Fat                             | 360                     | 360                                | 360                                     |
| Total Carbohydrate              | 2923                    | 2923                               | 2923                                    |
| Sugar                           | 400                     | 400                                | 400                                     |
| Total kcal                      | <b>3783</b>             | <b>3783</b>                        | <b>3783</b>                             |
| <b>kcal%</b>                    |                         |                                    |                                         |
| Protein                         | 13                      | 13                                 | 13                                      |
| Fat                             | 10                      | 10                                 | 10                                      |
| Total Carbohydrate              | 77                      | 77                                 | 77                                      |
| Sugar                           | 11                      | 11                                 | 11                                      |
| Total                           | 100                     | 100                                | 100                                     |
| <b>kcal/gm</b>                  | <b>3.78</b>             | <b>3.79</b>                        | <b>3.79</b>                             |

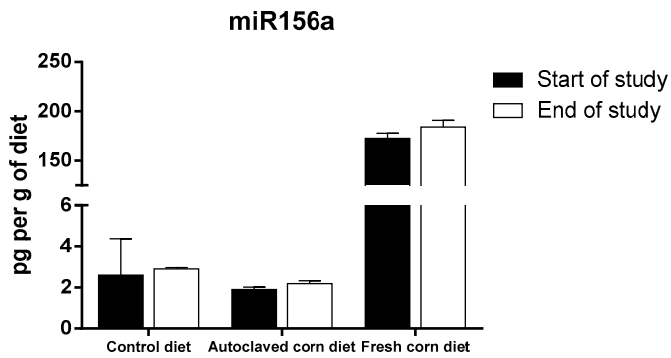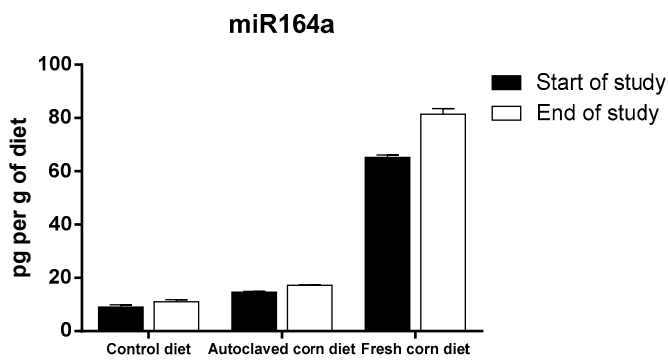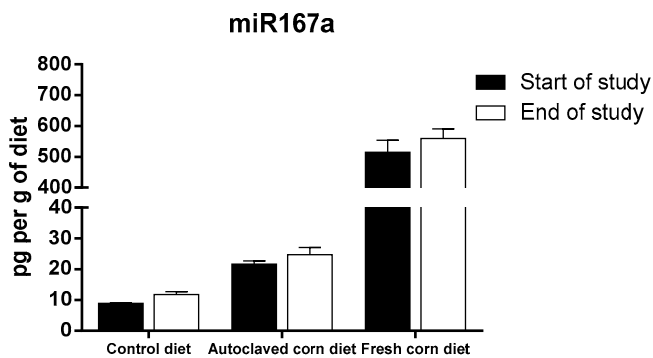

**Supplemental Fig. 1 Stability of corn miRNAs in the AIN-93M diet at the start and end of the feeding period.** MiRNAs were extracted from AIN-93M diets at the start or end of the feeding period. The relative concentrations of miR156a, miR164a, and miR167a were determined using RT-PCR.

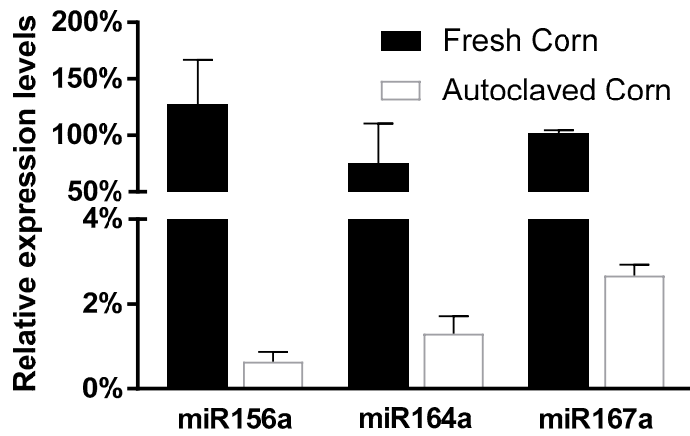

**Supplemental Fig. 2 Degradation of corn miRNAs after autoclaving.** Fresh corn kernels were autoclaved at 121 °C for 30 min. Then miRNAs were extracted from fresh corn kernels or autoclaved corn kernels. The relative concentrations of miR156a, miR164a, and miR167a were determined using RT-PCR.
